# Supplementary material
Source: PubMed Central journal article supplement (PMC7831721)
Supplement: mmc1.pdf [file mmc1.pdf]

## Supplementary Information

### Extinction probability of an epidemic

To explore the extinction probability and extinction time of an epidemic, we calculate them based on three kinds of distribution: a) Poisson distribution, *i.e.*,  $V(k) = E(k)$ ; b) power law distribution, *i.e.*,  $V(k) > E(k)$ ; c) binomial distribution, *i.e.*,  $V(k) < E(k)$ . The calculation method is as follows:

The probability generating function of  $k$  (progeny number of an individual) is defined as

$$G_k(s) = \sum_{k=0}^{\infty} p_k s^k = E(s^k)$$

where  $p_k$  is the probability distribution of  $k$ . Note  $G_k(1) = 1$ ,  $G_k(0) = p_0$ . Specifically, when  $k$  follows Poisson distribution [ $k \sim \text{Poisson}(\lambda)$ ], its probability generating function is

$$G_k(s) = \sum_{k=0}^{\infty} e^{-\lambda} \frac{\lambda^k}{k!} s^k = e^{\lambda(s-1)}$$

When  $k$  follows binomial distribution [ $K \sim \text{Bin}(n, p)$ ], its probability generating function is

$$G_k(s) = \sum_{k=0}^n \binom{n}{k} p^k (1-p)^{n-k} s^k = (1-p+ps)^n$$

The probability that the process is extinct by the  $n$ -th generation is

$$u_n = P(N(n) = 0 | N(0) = 1) \quad (A1)$$

where  $N(n)$  is the population size at  $n$ -th generation.  $N(0)$  is just the initial population size. Now  $u_n \leq 1$ , and  $u_n \leq u_{n+1}$  - *i.e.*,  $\{u_n\}$  is a bounded monotonic sequence [1]. So

$$u = \lim_{n \rightarrow \infty} u_n$$

exists and is called the probability of ultimate extinction. The average extinction time with  $N(0) = 1$  can be calculated as follows:

$$T = \sum_{t=1}^{\infty} t \times u_t \quad (A2)$$

Because of the independence,

$$P(N(n) = 0 | N(0) = k) = u_n^k \quad (A3)$$

Recall that  $p_k$  is the probability distributon of  $k$ , we can have the following theorem

$$u_n = \sum_{k=0}^{\infty} p_k (u_{n-1})^k \quad (A4)$$

Furthermore, when  $n \rightarrow \infty$ , we can know that  $u$  is the smallest non-negative root of following equation [1]

$$G_K(u) = \sum_{k=0}^{\infty} p_k u^k = u \quad (A5)$$

To explore the extinction probability of an epidemic, we calculate the extinction probability based on three kinds of distribution: a) Poisson distribution, *i.e.*,  $V(k) = E(k)$ ; b) power law distribution, *i.e.*,  $V(k) > E(k)$ ; c) binomial distribution, *i.e.*,  $V(k) < E(k)$ .

a) Poisson distribution

If  $k$  follows Poisson distribution [ $k \sim \text{Poisson}(\lambda)$ ], its probability generating function is

$$G_k(s) = \sum_{k=0}^{\infty} e^{-\lambda} \frac{\lambda^k}{k!} s^k = e^{\lambda(s-1)}$$

we can obtain its ultimate extinction probability by obtaining the smallest non-negative root of following equation:

$$G_k(u) = e^{\lambda(u-1)} = u \rightarrow u = \frac{\text{LambertW}(-\lambda e^{-\lambda})}{\lambda} \quad (A6)$$

where *LambertW* is the *Lambert W* function [2]. Here we let  $V(k) = E(k) = 0.5, 1.0, 1.05, 1.1, 1.2, 1.3, 1.4, 1.5, 2, 3, 4, 5$ . The extinction probability can be obtained by Eq. (A6). The results are shown in Table S1.

b) Binomial distribution

For binomial distribution [ $k \sim \text{Bin}(n, p)$ ], its probability generating function is

$$G_k(s) = \sum_{k=0}^n \binom{n}{k} p^k (1-p)^{n-k} s^k = (1-p + ps)^n$$

And its ultimate extinction probability is just the smallest non-negative root of following equation:

$$G_k(u) = (1-p + pu)^n = u \quad (A7)$$

we let  $p = q = 0.5$ ,  $E(k) = 0.5, 1, 2, 3, 4, 5$ . And then  $V(k) = 0.5E(k)$ . Use Eq. (A7), we can calculate the extinction probabilities of binomial distribution (Table S2)

c) Power law distribution

Just as Ruan *et al.* [3] suggest, we let the distribution of  $k$  follow the Zipf's law ([4]; a discrete format of power law distribution):

$$P(k = i; c, M) = \frac{1/(i + 1)^c}{H_{M,c}}, i = 0, 1, \dots, M - 1$$

where  $H_{M,c} = \sum_{m=1}^M 1/m^c$ . The mean and variance of  $k$  are

$$E(k) = \frac{H_{M,c-1}}{H_{M,c}} - 1$$

$$V(k) = \frac{H_{M,c-2}}{H_{M,c}} - \frac{H_{M,c-1}^2}{H_{M,c}^2}$$

Based on the definition above, we can calculate the extinction probability according to Eq. (A4) and Eq. (A5). We let  $V(k) = 5E(k)$  or  $10E(k)$ , and  $E(k)$  ranges from 0.5 to 5. In addition, we do a simulation to test the accuracy of the analytical equations. The simulation results are consistent with the analytical results (Table S3 and S4).

### Modeling the viral evolution in $H_0$ with different parameter sets

In main text, we simulate the viral evolution in  $H_0$  at PL<sub>0</sub> with following parameter set: power law distribution with  $V(k) = 5E(k)$ , initial  $E(k) = 1.1$  (Fig. 4). Here we expand the parameter set: (a) power law distribution with  $V(k) = 10E(k)$ , initial  $E(k) = 1.1$ , see Fig. S1; (b) poisson distribution with  $V(k) = E(k)$ , initial  $E(k) = 1.1$ , see Fig. S2. The patterns of Fig. 4, Fig. S1 and Fig. S2 are very similar. All of them show a bimodal distribution when  $z = 3$ , but not when  $z = 1$  or 0.3. The reason for this bimodal distribution is that most of the invasions with  $E(k) = 1.1$  would fail, which corresponds to the rapidly failed cases. The remaining would become extinct when the host population develops herd immunity, which takes more generations (denoted as  $G$ ) in this simulation. Only in the latter cases would  $N_{inf}$  be large enough to yield adaptive mutations for the virus to overcome the immune suppression. The main difference among them is  $G$  will turn to be larger as  $V(k)$  increases. This is because as  $V(k)$  increases, the time of extinction of fixation is shorten [5].

### References

- [1] Grimmett G, Stirzaker DR. Probability and random processes. Oxford: Oxford Univ. Press, 2009
- [2] Corless RM, Gonnet GH, Hare DEG, et al. On the lambertw function. Advances in Computational Mathematics, 1996, 5: 329-359
- [3] Ruan Y, Luo Z, Tang X, et al. On the founder effect in covid-19 outbreaks – how many infected travelers may have started them all? National Science Review, 2020, nwaa246
- [4] Zipf GK. Human behavior and the principle of least effort. Oxford, England: Addison-Wesley Press, 1949

[5] Crow JF, Kimura M. An introduction to population genetics theory. New York, Evanston and London: Harper & Row, Publishers, 1970

Supplementary tables and figures

**Table S1. Extinction probability of Poisson distribution with  $V(k) = E(k)$**

|          | $E(k)=0.5$ | 1 | 1.05 | 1.1  | 1.2  | 1.3  | 1.4  | 1.5     | 2       | 3       | 4       | 5       |
|----------|------------|---|------|------|------|------|------|---------|---------|---------|---------|---------|
| $N(0)=1$ | 1          | 1 | 0.91 | 0.82 | 0.69 | 0.58 | 0.49 | 4.2E-01 | 2.0E-01 | 6.0E-02 | 2.0E-02 | 7.0E-03 |
| 2        | 1          | 1 | 0.82 | 0.68 | 0.47 | 0.33 | 0.24 | 1.7E-01 | 4.1E-02 | 3.5E-03 | 3.9E-04 | 4.9E-05 |
| 3        | 1          | 1 | 0.74 | 0.56 | 0.32 | 0.19 | 0.12 | 7.3E-02 | 8.4E-03 | 2.1E-04 | 7.8E-06 | 3.4E-07 |
| 4        | 1          | 1 | 0.67 | 0.46 | 0.22 | 0.11 | 0.06 | 3.0E-02 | 1.7E-03 | 1.3E-05 | 1.5E-07 | 2.4E-09 |
| 5        | 1          | 1 | 0.61 | 0.38 | 0.15 | 0.06 | 0.03 | 1.3E-02 | 3.5E-04 | 7.5E-07 | 3.1E-09 | 1.7E-11 |

**Table S2. Extinction probability of binomial distribution with  $V(k) = 0.5E(k)$**

|          | $E(k)=0.5$ | 1    | 1.5     | 2       | 3       | 4       | 5       |
|----------|------------|------|---------|---------|---------|---------|---------|
| $N(0)=1$ | 1.00       | 1.00 | 2.4E-01 | 8.7E-02 | 1.7E-02 | 4.0E-03 | 9.9E-04 |
| 2        | 1.00       | 1.00 | 5.6E-02 | 7.6E-03 | 3.0E-04 | 1.6E-05 | 9.8E-07 |
| 3        | 1.00       | 1.00 | 1.3E-02 | 6.7E-04 | 5.2E-06 | 6.5E-08 | 9.7E-10 |
| 4        | 1.00       | 1.00 | 3.1E-03 | 5.8E-05 | 9.0E-08 | 2.6E-10 | 9.6E-13 |
| 5        | 1.00       | 1.00 | 7.3E-04 | 5.1E-06 | 1.6E-09 | 1.1E-12 | 9.5E-16 |

**Table S3. Extinction probability of power law distribution with  $V(k) = 10E(k)$**

|                             | $E(k)=0.5$ | 1    | 1.05 | 1.1  | 1.2  | 1.3  | 1.4  | 1.5  | 2    | 3    | 4    | 5    |
|-----------------------------|------------|------|------|------|------|------|------|------|------|------|------|------|
| $N(0)=1(\text{simulation})$ | 1.00       | 1.00 | 1.00 | 0.98 | 0.96 | 0.93 | 0.92 | 0.89 | 0.80 | 0.63 | 0.52 | 0.39 |
| $N(0)=1(\text{analytical})$ | 1.00       | 1.00 | 0.99 | 0.98 | 0.96 | 0.93 | 0.91 | 0.90 | 0.78 | 0.63 | 0.51 | 0.41 |
| 2                           | 1.00       | 1.00 | 0.98 | 0.96 | 0.92 | 0.87 | 0.84 | 0.80 | 0.61 | 0.39 | 0.26 | 0.17 |
| 3                           | 1.00       | 1.00 | 0.97 | 0.94 | 0.88 | 0.82 | 0.77 | 0.72 | 0.47 | 0.25 | 0.13 | 0.07 |
| 4                           | 1.00       | 1.00 | 0.96 | 0.92 | 0.84 | 0.76 | 0.70 | 0.65 | 0.37 | 0.15 | 0.07 | 0.03 |
| 5                           | 1.00       | 1.00 | 0.95 | 0.91 | 0.81 | 0.71 | 0.64 | 0.58 | 0.29 | 0.10 | 0.03 | 0.01 |

**Table S4. Extinction probability of power law distribution with  $V(k) = 5E(k)$**

|                             | $E(k)=0.5$ | 1    | 1.05 | 1.1  | 1.2  | 1.3  | 1.4  | 1.5  | 2    | 3    | 4    | 5    |
|-----------------------------|------------|------|------|------|------|------|------|------|------|------|------|------|
| $N(0)=1(\text{simulation})$ | 1.00       | 1.00 | 0.98 | 0.97 | 0.92 | 0.88 | 0.86 | 0.82 | 0.69 | 0.47 | 0.36 | 0.37 |
| $N(0)=1(\text{analytical})$ | 1.00       | 1.00 | 0.98 | 0.96 | 0.92 | 0.89 | 0.85 | 0.82 | 0.67 | 0.48 | 0.36 | 0.35 |
| 2                           | 1.00       | 1.00 | 0.96 | 0.92 | 0.85 | 0.79 | 0.72 | 0.67 | 0.45 | 0.23 | 0.13 | 0.12 |
| 3                           | 1.00       | 1.00 | 0.94 | 0.88 | 0.78 | 0.70 | 0.61 | 0.55 | 0.30 | 0.11 | 0.05 | 0.04 |
| 4                           | 1.00       | 1.00 | 0.92 | 0.85 | 0.72 | 0.63 | 0.52 | 0.45 | 0.20 | 0.05 | 0.02 | 0.02 |
| 5                           | 1.00       | 1.00 | 0.90 | 0.82 | 0.66 | 0.56 | 0.44 | 0.37 | 0.14 | 0.03 | 0.01 | 0.01 |

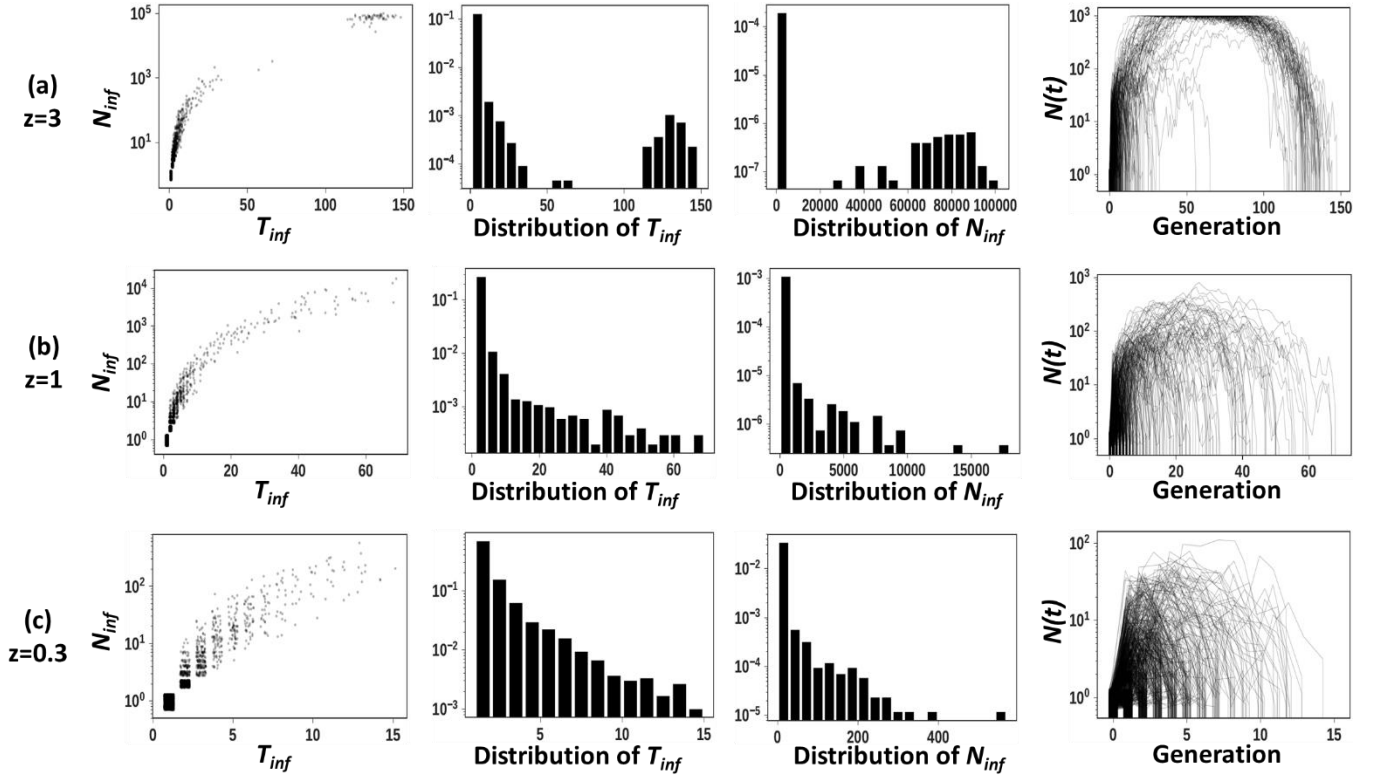

**Fig. S1. The distribution of  $T_{inf}$  and  $N_{inf}$  after viral invasion.** A virus (*i.e.*,  $N(0) = 1$ ) with initial  $E(k) = 1.1$  invades human population (population size is 1000). The distribution of  $k$  follows a power law distribution with  $V(k) = 10E(k)$ .  $T_{inf}$  is the duration between the initial infection and ultimate extinction.  $N_{inf}$  is the total number of infected individuals summed over all generations. Due to the prior build-up of herd immunity,  $E(k)$  will decrease at 3 different rates ( $z = 3, 1$ , or  $0.3$ ) as shown in Fig. 4a – 4c, respectively. For each parameter set, 3000 repeats are simulated. Each repeat is portrayed by a thin line in the last panel

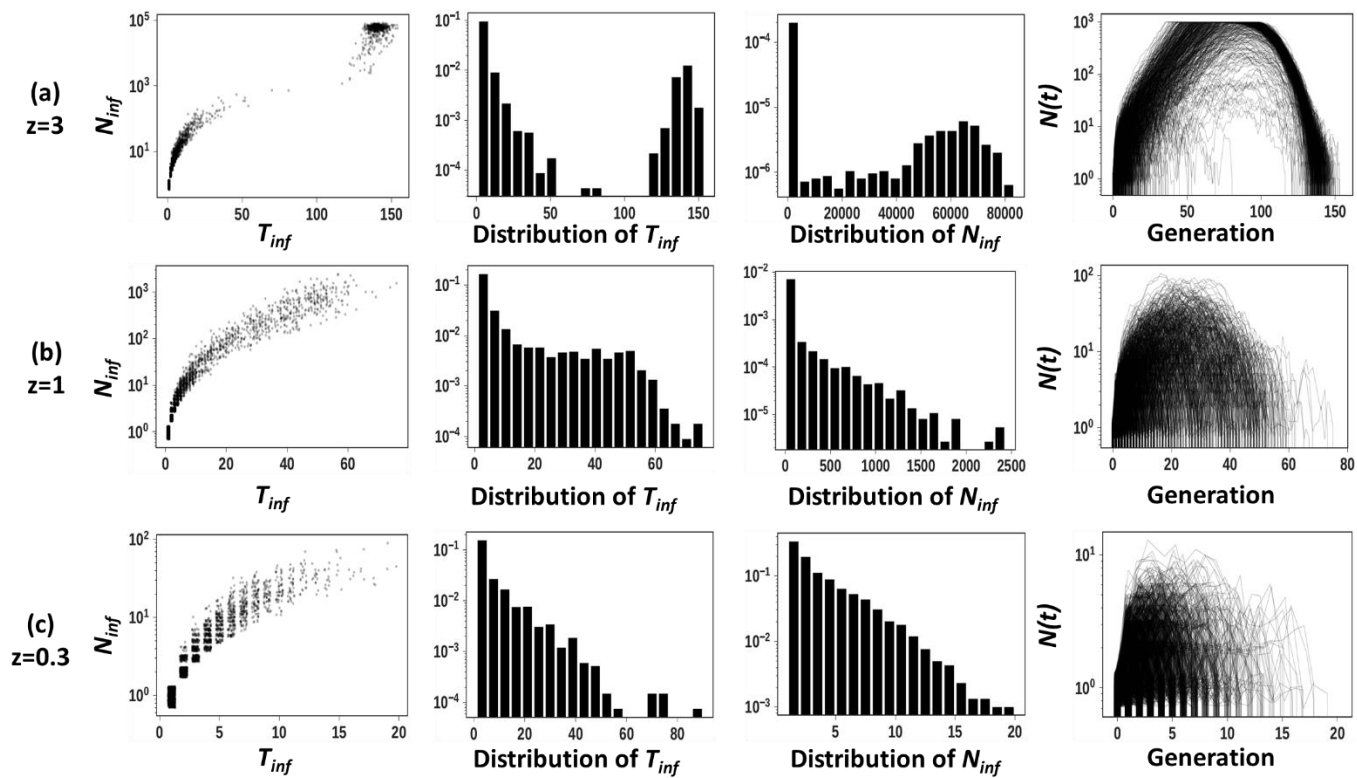

**Fig. S2.** same as Fig. S1 except that the distribution of  $k$  follows a Poisson distribution with  $V(k) = E(k)$ .
